# Supplementary material for: Contrasting Mixotrophic Lifestyles Reveal Different Ecological Niches in Two Closely Related Marine Protists
Source: PubMed Central journal article supplement (PMC7065223; doi:10.1111/jpy.12920), 2019-11-01

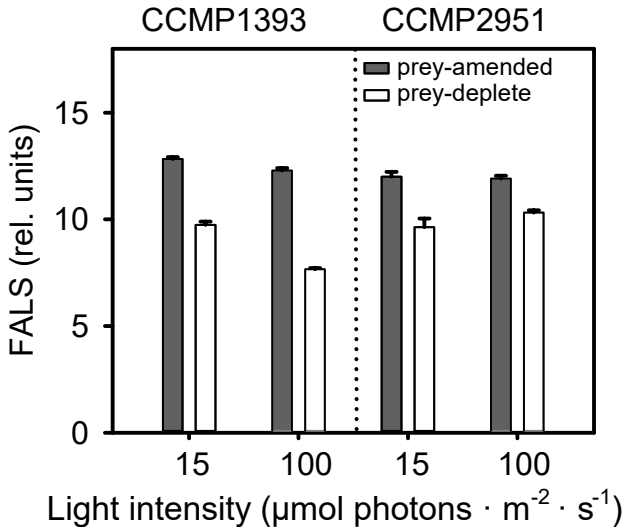

Supplement: JPY-56-52-s002.pdf [file JPY-56-52-s002.pdf]
